# Supplementary material
Source: publisher site journal article supplement (https://www.degruyter.com/publication/isbn/9783110331332/downloadAsset/9783110331332_Inhalt.pdf)
Supplement: Supplementary file 1 [file 9783110331332_Inhalt.pdf]

# Inhalt

## Einleitung — 1

### 1 Methode – Poetizität als Prozeß und Struktur — 5

### 2 Metrik — 15

Die Genese der Form – Prozeß und Struktur — 17

Die Logik der Form – Die alkäische Ode — 20

### 3 Neuedition — 27

### 4 Interpretation — 37

Titel *Empedokles* — 37

Strophe 1 — 41

Vers 1 *Das Leben suchst du ...* — 43

Vers 2 *Ein göttlich Feuer ...* — 67

Vers 3 *Und du in ...* — 83

Vers 4 *Wirfst dich hinab ...* — 95

**Zur Poetik des Erinnerns — 107**

Strophe 2 — 115

Vers 5 *So schmelzt' im Weine ...* — 117

Vers 6 *Der Königin; und ...* — 131

Vers 7 *Nur deinen Reichtum ...* — 139

Vers 8 *Hin in den ...* — 147

**Der Ausgleich der Gegensätze — 157**

Strophe 3 — 161

Vers 9 *Doch heilig bist du ...* — 163

Vers 10 *Die dich hinwegnahm ...* — 175

Vers 11 *Und folgen möcht' ich ...* — 183

Vers 12 *Hielte die Liebe ...* — 191

**Die ›poëtische Individualität‹ — 209**

## Literatur — 215
